# Supplementary material for: Optimizing extraction solvents for deoxynivalenol analysis in maize via infrared attenuated total reflection spectroscopy and chemometric methods
Source: Royal Society of Chemistry journal article supplement (doi:10.1039/d2ay00995a), 2022-11-25
Supplement: d2ay00995a1.pdf [file d2ay00995a1.pdf]

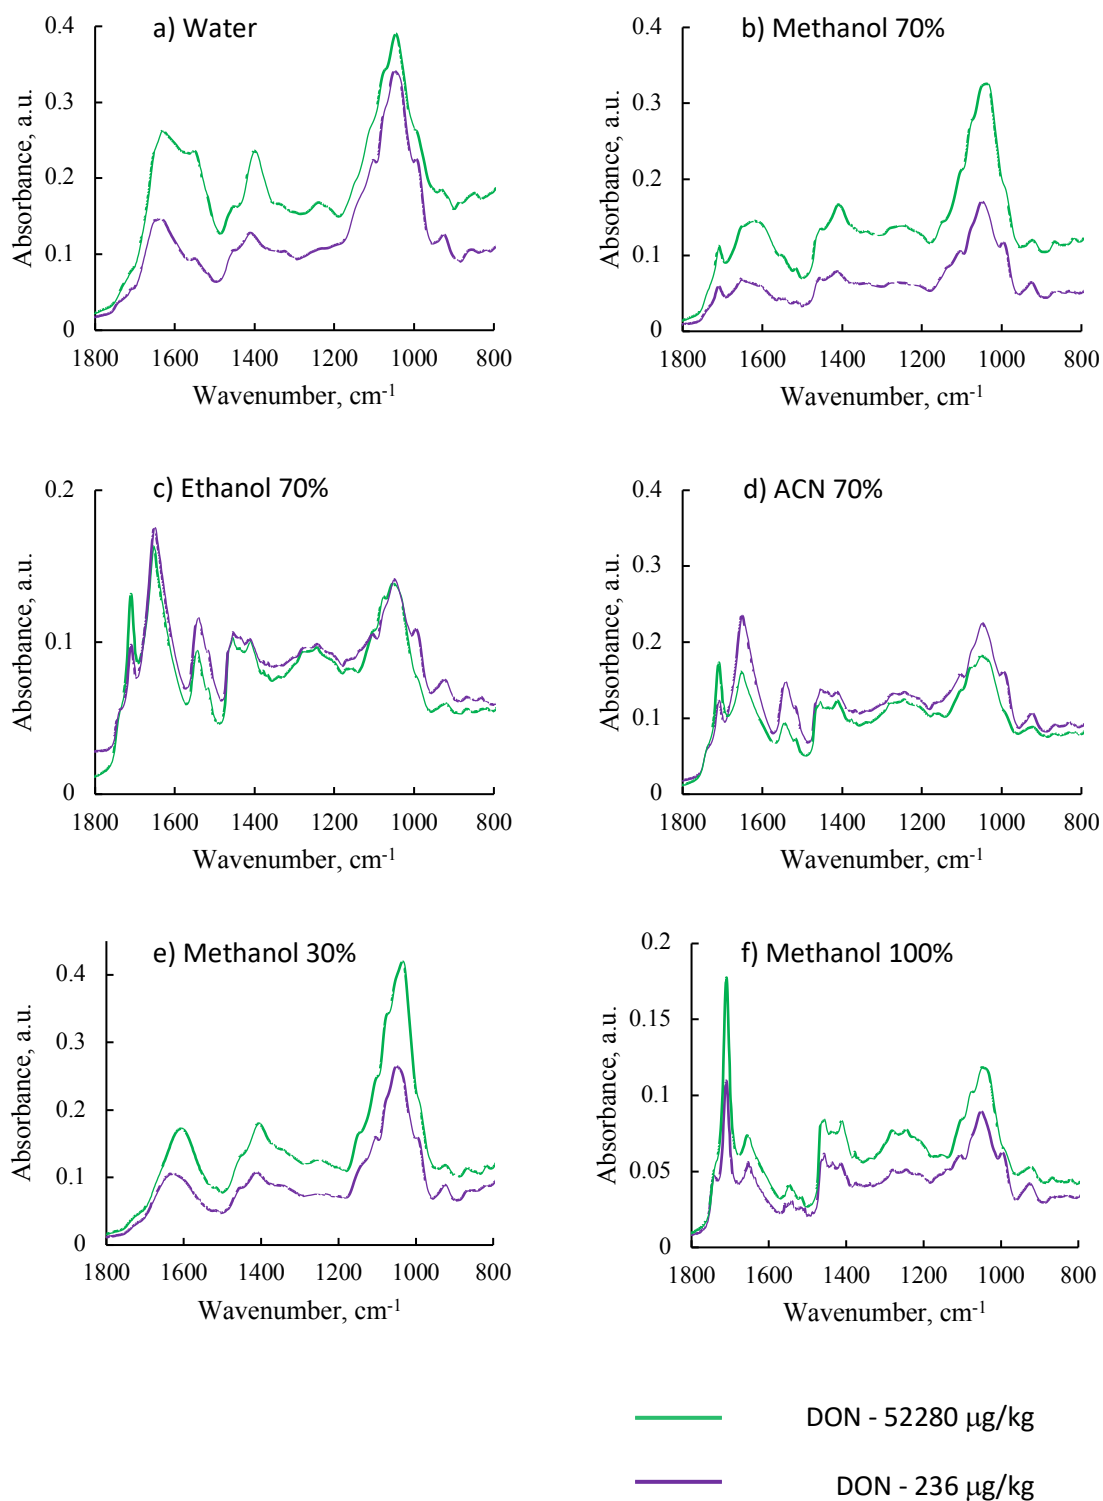

**Fig. S1.** FTIR spectra of high and low DON-contaminated maize extracts in a) water, b) methanol 70%, c) ethanol 70%, d) acetonitrile 70%, e) methanol 30%, f) methanol 100%.

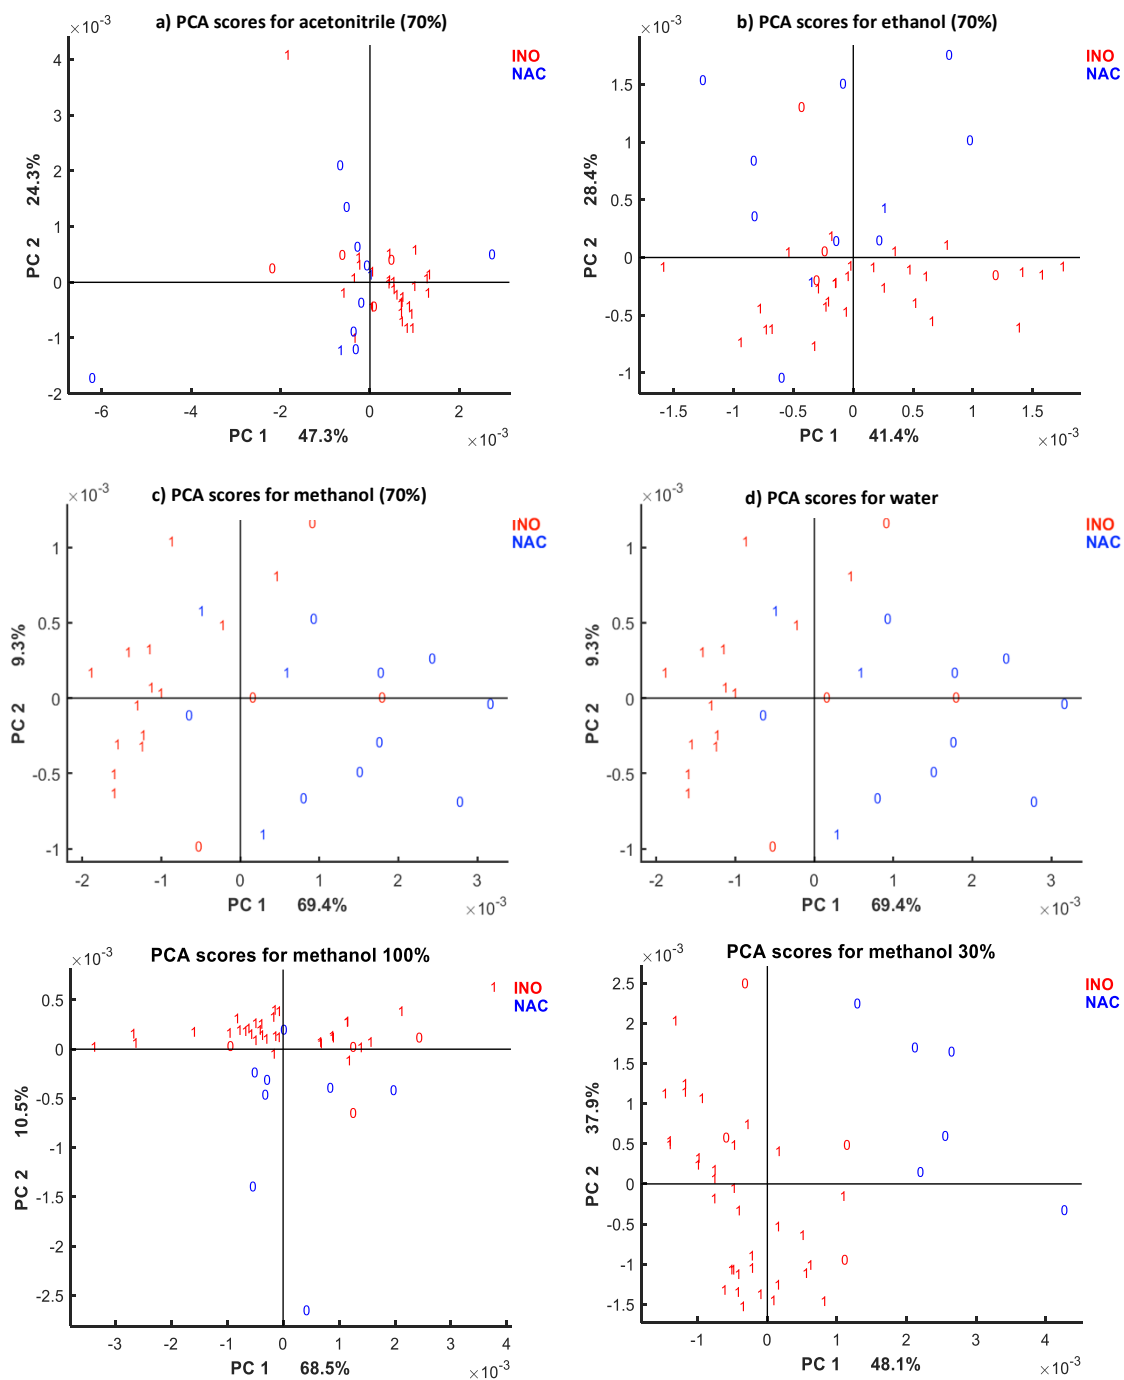

**Fig. S2.** PCA score plot of (a) acetonitrile (70%), (b) ethanol (70%), (c) methanol (70%), (d) water, (e) methanol (100%) and (f) methanol (30) extracts where colours of labels correspond to inoculation type: inoculated in red and naturally contaminated in blue while labels correspond to DON levels where 0:  $DON < 1750 \mu\text{g/kg}$ , 1:  $DON \geq 1750 \mu\text{g/kg}$  obtained by the reference method.
